# Supplementary material for: Naturally occurring antibodies against serum amyloid A reduce IL-6 release from peripheral blood mononuclear cells
Source: PLOS journal article supplement (doi:10.1371/journal.pone.0195346), 2018-04-04
Supplement: S1 (10.1371/journal.pone.0195346.s001) [file journal.pone.0195346.s001]

**A**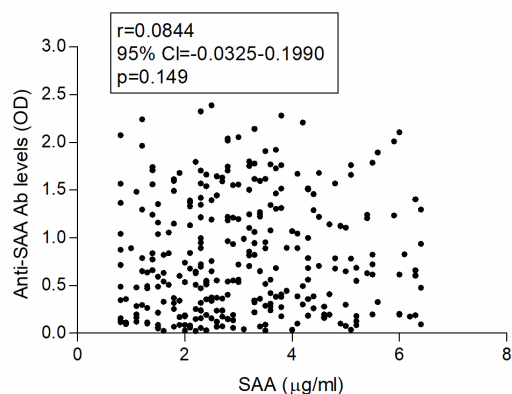**B**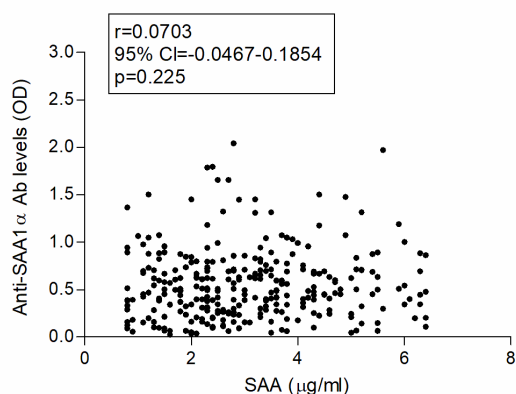

**S1 Fig. No correlation between sera concentration of SAA and anti-SAA (A) or anti-SAA1 $\alpha$  (B) antibody levels.** Spearman coefficient ( $r$ ), 95% confidence interval (CI) and  $p$  value are indicated. Ab, antibody; SAA, serum amyloid A.
